# Supplementary material
Source: publisher figshare collection journal article supplement (https://gsapubs.figshare.com/ndownloader/files/38910585)
Supplement: Supplementary file 1 [file 38910585]

## Sheet: Sheet1
Time (s)	Site 1	Site 2	Site 3	Site 4	Site 5	Site 6	Site 7	Site 8	Site 9	Site 10	Site 11	Site 12	Site 13	Site 14
0	30.457	33.664	43.433	30.176	21.348	54.22	62.668	136.944	17.026	15.909	138.296	186.956	32.83	234.941
1	31.832	34.387	43.853	30.82	27.085	58.691	65.078	138.538	18.875	17.814	137.068	187.832	33.724	249.617
2	34.07	33.947	43.929	31.002	33.947	61.243	66.987	140.943	34.318	20.219	136.04	188.461	34.132	265.651
3	35.467	32.533	43.832	31.464	44.785	63.555	70.145	145.792	47.751	23.225	134.878	189.043	34.115	273.185
4	36.691	30.621	43.346	32.203	50.317	67.279	72.396	149.509	58.417	22.808	134.239	189.982	33.634	278.933
5	37.647	28.586	43.021	32.312	55.688	71	74.938	153.434	70.54	20.988	133.745	191.038	34.487	285.467
6	37.219	25.854	42.741	32.175	62.849	75.17	77.616	159.487	76.465	18.913	133.193	192.881	43.16	288.953
7	36.044	25.02	42.537	32.075	66.445	81.465	79.108	163.577	79.935	26.252	133.036	197.134	62.855	291.877
8	33.863	25.228	42.786	32.237	69.665	85.391	80.841	167.644	80.467	49.457	132.904	200.673	75.735	295.03
9	32.738	26.831	43.074	32.244	73.414	88.954	83.877	173.965	79.354	78.504	132.914	204.54	87.469	296.528
10	32.351	28.369	43.765	31.917	75.164	93.48	85.821	178.127	82.312	114.066	133.013	210.801	103.084	297.561
11	33.09	29.914	44.177	31.021	75.636	95.909	87.696	182.362	104.005	135.048	133.164	214.875	112.352	298.196
12	34.073	30.409	44.177	30.125	75.638	97.829	89.872	188.532	131.535	159.056	133.44	218.83	120.743	298.996
13	35.271	29.579	44.614	29.565	75.914	100.219	91.07	192.492	156.434	171.842	133.69	224.554	131.821	299.435
14	37.182	28.338	44.478	29.235	76.222	101.608	92.183	196.29	184.213	170.97	133.949	228.107	138.443	299.855
15	38.307	26.12	44.256	29.079	76.099	102.624	93.715	201.669	201.961	168.689	134.296	231.694	144.624	300.476
16	38.764	24.637	43.89	28.934	76.873	103.682	94.538	205.105	204.27	172.384	134.516	236.332	153.196	300.745
17	38.282	23.367	43.783	28.525	78.139	104.333	94.851	208.37	203.14	181.777	134.751	239.097	158.558	300.862
18	37.052	22.965	43.815	28.011	79.409	105.034	94.434	212.975	202.14	192.414	135.06	241.761	163.654	301.008
19	35.444	24.031	44.015	27.336	80.865	105.877	93.869	215.855	200.992	201.897	135.492	245.331	170.687	301.178
20	33.277	25.7	44.281	26.381	81.98	106.38	93.051	218.593	199.423	213.462	135.75	247.73	175.074	301.187
21	32.844	28.316	44.535	25.8	83.206	106.852	92.355	222.328	198.423	223.674	136.059	249.715	179.607	301.018
22	33.141	30.018	44.818	25.222	84.351	107.387	92.354	224.656	198.548	231.905	136.944	251.499	186.554	300.869
23	34.361	31.001	44.962	24.57	84.581	107.693	92.34	226.84	198.548	236.677	138.538	252.787	191.207	300.741
24	35.452	30.788	45.018	24.423	84.686	107.988	92.723	229.843	198.181	237.399	140.943	253.607	195.728	300.635
25	36.533	29.894	45.019	24.486	84.811	108.283	92.935	231.691	198.373	239.145	145.792	254.558	201.546	300.412
26	37.472	28.814	45.007	24.762	85.112	108.384	93.172	233.344	198.616	239.397	149.509	255.337	205.127	300.164
27	37.715	27.094	45.065	25.065	85.568	108.45	93.391	234.241	199.184	239.936	153.434	255.636	208.553	299.432
28	36.795	25.87	45.3	25.294	86.011	108.448	93.665	234.405	198.406	238.726	159.487	256.165	210.459	298.851
29	35.455	25.15	45.429	25.886	86.086	108.472	93.784	234.879	197.912	237.232	163.577	256.838	206.105	297.846
30	33.192	25.871	45.461	26.757	86.403	108.568	93.317	235.513	196.972	235.966	167.644	256.835	198.419	296.455
31	31.93	27.149	45.53	27.57	86.234	108.64	92.514	236.651	195.656	235.275	173.965	257.248	198.527	295.896
32	31.198	28.612	45.675	28.175	85.81	108.738	91.801	237.242	194.787	234.233	178.127	257.347	207.575	295.383
33	31.381	30.835	45.758	28.036	85.615	108.799	90.943	237.899	193.58	234.157	182.362	257.281	218.233	294.823
34	32.058	31.948	45.645	28.059	85.207	108.826	89.831	238.401	192.779	233.852	188.532	257.571	233.629	294.324
35	32.981	31.881	45.511	27.877	85.01	108.66	89.303	239.932	191.717	232.491	192.492	258.614	242.894	293.797
36	34.691	30.156	45.312	27.393	84.867	108.514	89.317	240.136	189.96	231.776	196.29	259.714	250.817	292.999
37	35.735	28.558	45.185	27.07	84.709	108.258	89.615	241.52	187.809	230.954	201.669	260.972	260.346	292.558
38	35.726	26.866	45.162	26.75	84.745	108.099	89.738	242.158	186.44	230.727	205.105	263.013	265.923	292.107
39	35.122	24.512	45.295	26.723	84.628	108.054	90.078	243.601	183.113	230.86	208.37	264.327	270.872	291.247
40	35.096	23.663	45.447	26.952	84.406	108.077	90.844	244.204	180.479	230.586	212.975	265.624	277.309	290.81
41	35.65	23.653	45.719	27.551	83.764	108.135	91.416	245.992	174.441	231.749	215.855	267.469	280.906	290.516
42	37.127	24.952	46.13	27.606	83.396	108.121	91.496	246.685	165.647	232.975	218.593	268.545	284.053	289.95
43	38.261	25.47	46.197	27.639	83.304	108.008	92.022	248.094	161.593	234.255	222.328	268.545	287.929	289.494
44	39.388	25.323	45.882	27.933	83.023	107.652	92.816	250.56	157.073	236.125	224.656	270.947	290.011	289.449
45	40.717	24.425	45.731	28.248	82.955	107.257	93.094	252.202	154.656	235.181	226.84	271.755	291.867	289.539
46	40.813	24.095	45.746	28.448	82.474	106.967	92.902	253.972	152.435	233.205	229.843	272.474	293.122	289.783
47	40.481	23.777	45.767	29.214	82.249	106.702	92.777	254.8	150.674	185.727	231.691	273.441	293.677	289.796
48	38.737	23.507	45.782	30.276	82.26	106.66	92.321	255.553	146.964	159.635	233.344	274.047	293.923	289.687
49	38.012	22.813	45.546	31.289	82.276	106.676	91.712	256.246	130.419	152.456	235.241	274.582	294.359	289.774
50	37.987	22.123	45.466	32.579	82.289	106.811	91.946	257.132	108.062	157.303	237.405	275.353	295.411	290.043
51	38.821	21.388	45.509	33.824	82.295	106.916	92.172	258.062	99.943	174.426	238.279	275.812	296.236	290.414
52	39.616	21.809	45.543	34.062	82.496	107.077	92.344	258.905	96.616	192.061	239.513	276.283	297.029	290.754
53	40.507	23.039	45.574	34.312	82.796	107.24	92.636	259.664	95.705	212.364	240.651	276.817	298.158	290.957
54	41.632	24.979	45.624	34.515	83.375	107.331	92.78	260.362	96.322	217.857	241.242	277.105	298.8	291.087
55	42.083	27.543	45.743	35.365	83.326	107.387	92.846	261.471	97.03	212.066	241.899	277.444	299.326	291.397
56	41.479	27.543	45.862	36.519	83.253	107.427	92.553	261.669	100.588	198.98	242.401	277.784	300.032	291.536
57	41.287	27.147	45.909	37.937	83.13	107.369	92.484	262.713	101.516	169.826	242.932	277.935	300.407	291.576
58	40.051	25.64	45.941	38.57	83.265	107.301	91.997	261.135	101.743	151.054	243.136	278.082	300.775	291.568
59	39.456	24.568	46.062	38.928	83.347	107.226	91.774	260.733	99.561	140.047	244.52	278.376	301.146	291.638
60	40.994	23.517	46.122	39.399	83.473	107.195	91.569	259.023	95.585	140.261	245.158	278.588	301.228	292.003
61	40.817	22.245	46.119	39.552	83.78	107.201	91.035	253.84	91.127	148.315	246.601	278.757	295.615	292.472
62	40.702	21.644	46.189	39.743	83.843	107.246	90.857	231.74	88.581	159.8	247.204	274.22	274.622	292.632
63	41.066	20.938	46.336	40.98	83.826	107.357	90.511	223.439	90.344	188.931	248.992	263.856	254.96	292.6
64	41.937	21.655	46.47	41.909	83.954	107.352	90.03	212.815	95.663	230.002	249.685	250.358	234.065	292.785
65	42.684	24.297	46.734	42.251	84.587	107.366	89.551	196.713	111.825	228.878	250.094	228.904	203.198	293.048
66	43.436	28.073	46.904	43.74	84.33	107.33	89.325	191.505	123.296	225.956	251.56	215.233	183.731	293.169
67	43.566	33.332	47.009	44.976	84.064	107.153	88.671	185.056	129.11	224.111	252.202	202.556	166.45	293.076
68	43.575	36.637	47.126	45.795	81.763	106.953	87.679	181.564	137.327	224.146	253.972	186.188	143.123	292.72
69	43.495	38.537	47.081	45.723	78.943	106.837	86.809	178.648	145.725	224.717	254.8	176.871	129.018	292.538
70	43.32	39.331	47.071	44.962	75.486	106.648	85.195	175.071	154.322	225.925	255.553	168.809	116.121	292.254
71	43.408	39.283	47.057	43.836	69.102	106.511	84.457	173.26	175.411	225.366	256.246	161.859	98.428	292.154
72	43.629	39.186	46.98	43.567	64.758	106.487	83.498	171.836	189.247	225.141	257.132	153.565	88.13	292.12
73	44.045	38.776	46.921	43.75	60.705	106.479	82.005	170.222	193.986	224.512	258.062	149.362	79.507	292.127
74	44.296	38.573	46.885	43.819	56.031	106.454	79.962	169.567	193.226	222.727	259.905	145.955	68.004	292.029
75	44.517	38.401	46.723	43.432	53.894	106.34	76.699	169.332	192.12	218.267	260.664	142.333	60.883	291.818
76	44.193	38.622	46.677	43.191	52.634	106.307	70.795	169.578	191.585	212.35	261.362	140.982	54.354	291.457
77	43.279	39.597	46.664	42.814	51.134	105.872	66.62	169.84	190.638	204.1	262.471	140.326	45.869	291.206
78	42.296	39.871	46.644	42.74	50.352	102.242	62.783	169.94	190.5	178.975	262.669	140.373	41.031	290.962
79	41.492	39.882	46.749	42.657	49.145	98.376	57.76	170.21	190.203	160.061	262.713	141.025	36.766	290.717
80	41.556	39.434	46.802	42.71	49.012	94.132	55.368	170.34	191.734	142.293	262.823	142.214	31.418	290.751

## Sheet: G50623
Li, L., et al., 2023, In situ Raman observations reveal that the gas fluxes of diffuse flow in hydrothermal systems are greatly underestimated: Geology, https://doi.org/10.1130/G50623.1
